# Supplementary material
Source: HighWire-hosted journal article supplement (https://bmjopen.bmj.com/content/12/6/e058015)
Supplement: inline-supplementary-material-3 [file inline-supplementary-material-3.pdf]

DIPPAO randomized controlled trial: study protocol

### SUPPLEMENTARY ONLINE MATERIAL 3

*Information letter and consent form in French (Version 3, 03/06/2021).*

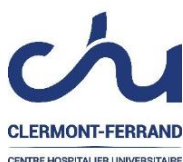

## LETTRE D'INFORMATION

Etude DIPPAO : évaluation des effets d'une intervention connectée pour promouvoir l'activité physique et diminuer la sédentarité chez des patients atteints d'obésité et/ou de diabète de type 2

Madame, Monsieur,

Nous vous proposons de participer au protocole de recherche intitulé « DIPPAO ». Nous vous invitons à lire attentivement cette lettre d'information qui a pour but de répondre aux questions que vous seriez susceptible de vous poser avant de prendre votre décision de participation.

Ce document vous appartient et nous vous invitons à en discuter avec votre médecin et vos proches.

#### **1) Objectif de la recherche**

Selon de nombreuses études, le niveau d'activité physique de patients ayant un diabète de type 2 ou une obésité est particulièrement faible. Or la pratique régulière d'une activité physique permet non seulement de prévenir le risque de développer les maladies chroniques mais également de limiter leur progression et de diminuer la mortalité précoce liée à ces maladies. C'est pourquoi nous cherchons à développer à travers cette étude scientifique des interventions permettant d'augmenter l'activité physique de ces patients et que nous sollicitons votre participation.

L'objectif principal de ce projet est d'étudier l'effet d'une intervention digitale (Kiplin, <https://www.kiplin.com/>) composée de trois « briques » (des séances d'activité physique adaptée (APA) interactives en visio-conférence + animations connectées sous forme de jeux collectifs + suivi de l'activité physique avec un bracelet connecté et une application) sur l'activité physique globale et le temps de sédentarité chez des patients atteints d'obésité et/ou de diabète de type 2 en comparaison avec la prise en charge classique au CHU de Clermont-Ferrand.

Les objectifs secondaires sont d'augmenter l'adhérence au programme et de diminuer le temps d'accompagnement en présentiel.

## DIPPAO randomized controlled trial: study protocol

A travers une augmentation de l'activité physique, l'objectif est d'améliorer votre santé. En effet les études scientifiques et les sociétés savantes sont unanimes sur le fait que l'atteinte des recommandations en activité physique permet de conserver un bon état de santé et d'améliorer sa qualité de vie. Nous pensons que ces nouvelles méthodes pourraient être utiles mais nous aimerions le démontrer car rien n'est actuellement prouvé.

## 2) **Méthodologie**

Dans cette étude vous suivrez un programme de 3 mois. Nous testerons différentes variantes de l'intervention (intervention Kiplin ou séances d'activité physique adaptée en présentiel au CHU) afin d'évaluer quel format est le plus efficace pour augmenter et maintenir votre activité physique à la fin de l'intervention (3 mois de prise en charge au CHU) et 6 mois après la fin de l'intervention. Vous serez réparti dans l'un des deux groupes de l'étude aléatoirement selon une procédure de tirage au sort faite par ordinateur. Lors de votre prise en charge par un programme d'activité physique adaptée vous serez donc dans l'un des 2 groupes suivants :

- Groupe Kiplin

Groupe prise en charge traditionnelle

La méthodologie, les tests effectués ou encore la durée de votre participation seront strictement identiques qu'importe le groupe. Ces éléments sont décrits plus précisément ci-dessous. Au total, 48 patients seront inclus dans cette étude (24 par groupe).

## 3) **Description des deux prises en charge**

- Groupe Kiplin : 3 séances d'activité physique adaptée par semaine, d'abord en présentiel au CHU puis en visioconférence depuis chez vous via l'application mobile Kiplin. Parallèlement, vous pourrez, via l'application mobile Kiplin : suivre votre activité physique, participer à des animations sous forme de jeux par équipes où votre quantité d'activité physique vous permet de progresser dans le jeu, interagir avec les autres participants du Groupe Kiplin.
- Groupe prise en charge traditionnelle CHU : 3 séances d'activité physique adaptée par semaine en présentiel pendant 3 mois au CHU

## 4) **Déroulement pratique**

Si vous acceptez de participer à cette étude, vous serez suivi pendant 9 mois à partir de votre inclusion dans l'étude et vous aurez 5 visites (dont une seule supplémentaire par rapport à votre prise en charge originelle) :

- Visite de sélection : 1 mois avant le début de l'intervention (*environ 30 minutes*) : au cours de cette visite, le médecin investigateur vérifiera que vous pouvez participer au protocole et si tel est le cas vous proposera de participer à l'étude et vous remettra la lettre d'information. Suite à cette lecture, si vous souhaitez

## DIPPAO randomized controlled trial: study protocol

participer à l'étude un formulaire de consentement vous sera transmis pour signature.

- Visite d'inclusion : 8 jours avant le début de votre programme (moins de 10 minutes) : Cette courte visite sera l'occasion pour vous de signer le formulaire de consentement avec le médecin investigateur. Vous repartirez avec un bracelet connecté Garmin ainsi que l'accéléromètre. Pendant cette semaine d'évaluation vous n'aurez pas accès aux données d'activité de la montre.
- Visite d'évaluation au début de l'intervention (M0) (environ 45 minutes) : Cette visite sera effectuée en amont de votre première séance d'APA afin de faciliter votre prise en charge. Vous ramènerez l'accéléromètre à cette occasion. Au cours de cette visite vous effectuerez les tests (détaillés ci-après) permettant l'évaluation de vos capacités physiques. Ces tests font partie de la prise en charge habituelle et ne vous demanderont pas plus de temps. Vous devrez également remplir plusieurs questionnaires évaluant notamment votre niveau d'activité physique, votre bien-être physique et émotionnel, votre motivation à la pratique d'activité physique. Vous serez informé à ce stade de votre groupe de prise en charge (Kiplin ou prise en charge traditionnelle) et pourrez dès lors planifier vos séances d'activité physique adaptée selon votre groupe.
- Visite d'évaluation à la fin de l'intervention (M3) (environ 45min) : Tests et questionnaires identiques aux précédentes visites.
- Visite M9 (6 mois après la fin de l'intervention) + évaluations (environ 45min) : Tests et questionnaires identiques aux précédentes visites.

### 5) Calendrier de suivi pour cette étude

Si vous acceptez de participer à cette étude et si vous remplissez toutes les conditions requises, vous serez suivi(e) dans le cadre du protocole du service de Médecine du sport du CHU de Clermont-Ferrand.

Le calendrier de votre suivi sera le suivant :

|                      | Visite 1<br>Sélection | Visite 2<br>Inclusion | Visite 3<br>M0 | Visite 4<br>M3 | Visite 5<br>M9 |
|----------------------|-----------------------|-----------------------|----------------|----------------|----------------|
|                      | (30 min)              | (10 min)              | (45 min)       | (45 min)       | (45 min)       |
| Consentement éclairé | X                     |                       |                |                |                |

## DIPPAO randomized controlled trial: study protocol

|                                                                                              |   |   |   |   |   |
|----------------------------------------------------------------------------------------------|---|---|---|---|---|
| Critères d'inclusion et de non-inclusion                                                     | X |   | X |   |   |
| Données sociodémographiques, poids, taille, tour de taille, pression artérielle, médicaments | X |   |   | X | X |
| Questionnaire activité physique                                                              |   |   | X | X | X |
| Échelle de douleur                                                                           |   |   | X | X | X |
| Questionnaires bien-être psychologique et motivation à l'activité physique                   |   |   | X | X | X |
| Accéléromètre et bracelet Garmin                                                             |   | X |   | X | X |
| Composition corporelle                                                                       |   |   | X | X | X |
| Endurance                                                                                    |   |   | X | X | X |
| Force musculaire                                                                             |   |   | X | X | X |
| Pression artérielle                                                                          |   |   | X | X | X |

## 6) Description des tests réalisés

Les évaluations réalisées pour chacune des 3 visites (au début, à la fin des 3 mois et à la fin des 9 mois) sont les suivantes :

- Un bilan de vos capacités physiques sera effectué. Vous aurez pour cela 3 tests à réaliser :
  - Un test de force des membres supérieurs appelé « handgrip » durant lequel nous vous demanderons de serrer fort sur une poignée pendant 15 secondes. Deux essais seront enregistrés.
  - Un test de force des membres inférieurs sera réalisé grâce à un dynamomètre permettant de mesurer la force maximale d'extension du genou. Les mesures seront effectuées à trois vitesses différentes. Pour chaque vitesse, deux essais de 3 répétitions successives seront réalisés et la meilleure performance sera conservée. Vous disposerez de 2 minutes de repos entre chaque essai.
  - Un test d'endurance cardio respiratoire sera réalisé par l'intermédiaire du test de marche de six minutes ; l'objectif de ce test est de marcher aussi vite que vous pouvez pendant six minutes. La distance parcourue pendant les six minutes sera mesurée.

L'évaluation de la condition physique sera réalisée par la même personne, dans la même journée et toujours dans le même ordre.

## DIPPAO randomized controlled trial: study protocol

- Suite aux tests de condition physique, vous devrez remplir plusieurs questionnaires
  - Le questionnaire RPAQ qui vous permet de préciser votre niveau d'activité physique.
  - Vous remplirez un deuxième questionnaire évaluant votre qualité de vie.
  - Le troisième questionnaire évaluera vos relations avec les autres patients durant l'intervention.
  - Plusieurs questionnaires permettront de mesurer votre motivation pour l'activité physique et vos sentiments envers cette activité.  
Un autre questionnaire vous demandera de décrire la discrimination que vous pouvez percevoir venant des autres personnes dans votre vie de tous les jours. Enfin un dernier questionnaire visera à évaluer l'impact émotionnel de la COVID-19.
  
- Un accéléromètre vous sera également remis. Il s'agit d'un petit boîtier (3 cm x 3 cm) que l'on fixe autour de la taille à l'aide d'une sangle élastique et qui permet d'enregistrer les mouvements. Sa petite taille et le fait que l'on peut porter le capteur sur ou ses vêtements rend l'appareil facile à porter et il s'oublie très vite. Ce capteur devra être porté pendant 7 jours du lever au coucher, sauf pendant les activités aquatiques (douche, bain, natation, etc.). Il va enregistrer sur 7 jours (enregistrement la journée) l'ensemble des mouvements que vous faites pour que nous puissions évaluer votre temps d'activité physique de faible, moyenne ou haute intensité
  
- Un bracelet connecté de la marque Garmin vous sera également remis. Il s'agit d'un appareil que vous porterez au poignet quotidiennement pendant la durée de l'étude, qui reconnaît et enregistre automatiquement vos différentes activités physiques. Si vous êtes dans le Groupe « prise en charge traditionnelle », l'affichage sera paramétré pour n'afficher que la date et l'heure pendant la durée de l'intervention (soit pendant 3 mois), et l'ensemble des fonctionnalités seront ensuite activées pour que vous puissiez continuer à utiliser l'objet.
  
- Bio-impédancemètre : vous monterez sur une balance qui permet de mesurer - en plus de votre poids - votre composition corporelle, c'est-à-dire la quantité de graisse (ou masse grasse), la quantité de muscles (ou masse musculaire) et la quantité d'eau de votre corps. Cela vous permet de mieux comprendre de quoi est fait votre poids quand vous vous pesez.

## DIPPAO randomized controlled trial: study protocol

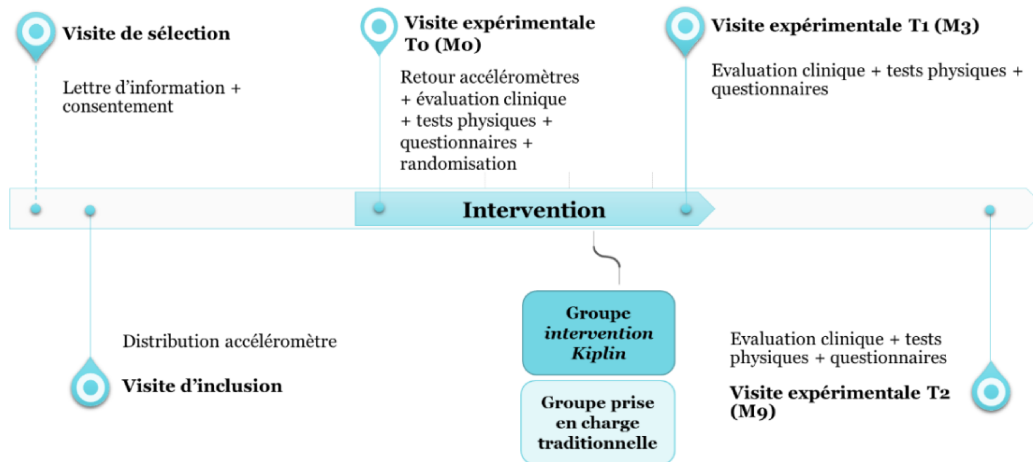

Schéma récapitulatif du protocole expérimental

Toutes les visites auront lieu au CHU.

### 7) Vos bénéfices à participer à cette étude

Vous aurez l'opportunité de tester de nouvelles méthodes originales de changement de comportement de manière gratuite.

⇒ L'avantage que vous pouvez attendre en participant à cette étude est une augmentation de votre activité physique, une meilleure gestion du stress, de la fatigue, du sommeil, une amélioration de votre condition physique et donc un bien-être physique et émotionnel. Ces résultats sont ceux attendus mais ne sont pas pour autant garantis.

### 8) Rémunération

⇒ Au début de l'étude vous sera distribué un objet connecté Garmin. Ce bracelet vous sera offert à la fin de l'étude. Toutes les fonctionnalités de l'objet ne seront pas accessibles par tous lors de l'étude mais seront bien évidemment débloquées et disponibles à l'issue de l'étude quand l'objet vous sera offert.

### 9) Risques et contraintes prévisibles

Risques liés à la pratique :

## DIPPAO randomized controlled trial: study protocol

Les risques encourus lors des sessions d'activité du programme sont minimales compte tenu :

- 1) des faibles risques de traumatismes musculaires ou ostéo-articulaires induits par la nature des activités qui seront proposées et,
- 2) de l'intensité de l'exercice qui sera légère (pas de risque cardio-vasculaire).

Vous n'aurez pas plus de contraintes que d'habitude puisque les visites s'effectuent au CHU dans la continuité de votre prise en charge et que l'intervention vous est proposée gratuitement de manière intégrale. De potentielles contraintes peuvent survenir avec le port des matériels d'évaluation mais de nombreux conseils vous seront prodigués afin que vous ne ressentiez aucune gêne.

### **10) Informations utiles :**

Votre participation à cette recherche n'engendrera aucun frais pour vous.

Toutefois, pour pouvoir participer à cette recherche vous devez être affilié(e) ou bénéficier d'un régime de sécurité sociale, et ne pas être placé(e) sous sauvegarde de justice.

Le CHU de Clermont-Ferrand, qui organise cette recherche en qualité de promoteur, a contracté une assurance conformément aux dispositions législatives, garantissant sa responsabilité civile et celle de tout intervenant auprès de la société d'assurances Biomedicinsure. Le numéro de contrat est 0840718730010. Dans le cas où votre état de santé serait altéré du fait de votre participation à l'étude, conformément à la loi n°2012-300 du 5 mars 2012 relative aux recherches impliquant la personne humaine, vous seriez en droit de recevoir des dédommagements dans le cadre de ce contrat d'assurance spécifique.

Vous ne pourrez participer à aucune étude pendant toute la durée de la recherche et les 6 mois suivant la fin de la recherche. Vous ne devez pas non plus avoir participé à une recherche dans les 6 mois précédant votre participation à cette étude.

Cette recherche impliquant la personne humaine a reçu l'avis favorable du Comité de Protection des Personnes Ile de France XI en date du 27/01/2021.

Il est possible que cette recherche soit interrompue, si les circonstances le nécessitent, par le promoteur ou à la demande de l'autorité de santé.

Si vous considérez que vous avez subi un préjudice lors de votre participation à l'étude, vous devez immédiatement contacter l'investigateur coordonnateur :

Pr Martine Duclos

Chef de Service de Médecine du Sport et des Explorations Fonctionnelles et Respiratoires

CHU Gabriel Montpied - Clermont-Ferrand

[mduclos@chu-clermontferrand.fr](mailto:mduclos@chu-clermontferrand.fr)

## DIPPAO randomized controlled trial: study protocol

**11) Données personnelles recueillies :**

Votre participation à cette étude implique la collecte et le traitement des données personnelles suivantes :

- État civil et coordonnées (nom, prénom, année de naissance, sexe, email)
- Composition corporelle et données anthropométriques (taille, poids, tour de taille)
- Pression artérielle systolique et diastolique
- Données de condition physique (résultats des tests physiques)
- Données d'activité physique et de sédentarité (questionnaire + niveau d'activité physique mesuré par l'objet connecté et par accéléromètre)
- Données de qualité de vie (questionnaire)
- Données relatives au soutien social perçu et aux relations partagées avec les autres patients (questionnaire)
- Données visant à évaluer votre motivation pour l'activité physique et vos sentiments envers cette activité (questionnaire)
- Données portant sur la discrimination que vous pouvez percevoir venant des autres personnes dans votre vie de tous les jours (questionnaire)
- Données de participation aux séances d'activité physique adaptée et aux animations connectées (si vous êtes dans le Groupe Kiplin)
- Contributions éventuelles sur les espaces de messagerie au sein de l'application mobile Kiplin (si vous êtes dans le Groupe Kiplin)

**12) Protection de vos données personnelles :**

Dans le cadre de cette recherche, le CHU de Clermont-Ferrand est responsable de la mise en œuvre du traitement de données à caractère personnel. Ce traitement informatique a pour but d'analyser les résultats de la recherche au regard de l'objectif de cette dernière qui vous a été présenté.

Le fondement juridique, au regard de l'article 6 du RGPD (Règlement Général sur la Protection des Données) est l'intérêt légitime du promoteur à mettre en œuvre le traitement de données médicales à des fins de recherche scientifique (article 9.2 du RGPD).

A cette fin, toutes les données médicales vous concernant et les données relatives à vos habitudes de vie nécessaires pour la recherche seront transmises au Promoteur, ou aux personnes ou sociétés agissant pour son compte, en France.

Ces données seront identifiées par un numéro de code et vos initiales. Ces données pourront également, dans des conditions assurant leur confidentialité, être transmises aux autorités de santé françaises, à d'autres entités du CHU de Clermont Ferrand.

Les données seront conservées au minimum 15 ans après la fin de la recherche, selon les dispositions légales en vigueur.

Le représentant du promoteur ou celui des Autorités de Santé, tenu au secret professionnel, peut avoir accès à votre dossier médical pour contrôle de conformité. En effet seules les données du dossier médical sont directement identifiantes. Leur consultation (par représentants autorisés) obéit à des règles strictes. Toutes les autres données "données de l'étude" sont des données codées transmises au promoteur qui les possède et peut les transmettre selon certaines règles. Les résultats de l'étude n'utilisent que ces données codées et leur publication respecte de ce fait l'anonymat.



## DIPPAO randomized controlled trial: study protocol

Dans le cadre de cette recherche, la société Kiplin, éditrice de la solution connectée utilisée dans l'intervention, sera amenée à traiter certaines de vos données personnelles (coordonnées, sexe et année de naissance, données d'activité physique collectées par l'objet Garmin, contributions sur les espaces de messageries au sein de l'application, participation aux séances d'activité physique adaptée en visioconférence). Kiplin s'engage à mettre en œuvre toutes les mesures techniques et organisationnelles nécessaires pour assurer la sécurité et la confidentialité de vos données. En particulier, l'ensemble des données collectées via la solution Kiplin seront hébergées dans un environnement certifié pour l'hébergement de données de santé (hébergeur : Proginov – 44118 La Chevrolière).

Conformément aux dispositions du RGPD et de la loi informatique et libertés du 6 janvier 1978 modifiée, vous disposez d'un droit d'accès, de rectification et de limitation du traitement de vos données.

Conformément aux dispositions du RGPD, vous disposez également d'un droit d'opposition à la transmission des données couvertes par le secret professionnel susceptibles d'être utilisées dans le cadre de cette recherche et d'être traitées. Dans ce cas, l'exercice de ce droit vous empêchera de participer à la recherche.

Conformément à l'article 17.3 du RGPD, les données recueillies préalablement au retrait du consentement, le cas échéant, ne seront pas effacées et continueront à être traitées dans les conditions prévues par la recherche.

Pour exercer ces droits ou pour toute question sur le traitement de vos données, vous pouvez contacter notre délégué à la protection des données : CHU de Clermont-Ferrand – Direction de la Qualité – Gestion des Risques et Droits des Usagers – 58 rue Montalembert – 63003 Clermont-Ferrand cedex 1 (ou [dpd@chu-clermontferrand.fr](mailto:dpd@chu-clermontferrand.fr))

Vous pouvez également accéder directement ou par l'intermédiaire d'un médecin de votre choix à l'ensemble de vos données médicales en application des dispositions de l'article L. 1111-7 du code de la santé publique. Ces droits s'exercent auprès du médecin qui vous suit dans le cadre de la recherche et qui connaît votre identité.

Si vous estimez, après nous avoir contactés, que vos droits Informatique et Libertés ne sont pas respectés ou que le dispositif de contrôle d'accès n'est pas conforme aux règles de protection des données, vous pouvez adresser une réclamation auprès de la CNIL (<https://www.cnil.fr/>) par courrier.

### 13) Aspects légaux

Vous avez le droit de refuser de participer à cette recherche sans avoir à vous justifier. Votre choix n'influencera en rien le rapport que vous avez avec votre équipe soignante. Si vous acceptez de participer, vous avez le droit de retirer votre consentement à tout moment sans avoir à vous justifier.

Vous pourrez à tout moment durant l'essai vous adresser au Pr Martine Duclos et à son équipe pour leur poser toutes questions complémentaires.

Toute information nouvelle survenant pendant la participation et pouvant éventuellement modifier votre décision de participation, vous sera donnée.

Par ailleurs, vous pourrez être tenu(e) informé(e) des résultats globaux de cette recherche à la fin de l'étude.

## DIPPAO randomized controlled trial: study protocol

Lorsque vous aurez lu cette lettre d'information et obtenu les réponses aux questions que vous vous posez en interrogeant le médecin investigateur, il vous sera proposé, si vous en êtes d'accord, de donner votre consentement écrit en signant le document préparé à cet effet. Vous disposez d'un délai de réflexion pour remettre ce document signé.

## DIPPAO randomized controlled trial: study protocol

**FORMULAIRE DE CONSENTEMENT DE PARTICIPATION A UNE RECHERCHE  
IMPLIQUANT LA PERSONNE HUMAINE**

Etude DIPPAO : évaluation des effets d'une intervention digitale pour promouvoir l'activité physique et diminuer la sédentarité chez des patients atteints d'obésité et/ou de diabète de type 2

**Investigateur principal :**

Pr Martine Duclos

Chef de Service de Médecine du Sport et des Explorations Fonctionnelles et Respiratoires

CHU Gabriel Montpied

Clermont-Ferrand

[mduclos@chu-clermontferrand.fr](mailto:mduclos@chu-clermontferrand.fr)

Je déclare :

- que le Docteur (nom, prénom, téléphone) ..... m'a proposé de participer à l'étude sus nommée,
- qu'il m'a expliqué en détail le protocole,
- qu'il m'a notamment fait connaître :
  - l'objectif, la méthode et la durée de l'étude
  - les contraintes et les risques potentiels encourus
  - mon droit de refuser de participer et en cas de désaccord de retirer mon consentement à tout moment
  - mon obligation d'inscription à un régime de sécurité sociale
  - que, si je le souhaite, à son terme, je serais informé(e) par le médecin investigateur de ses résultats globaux
  - que je ne serai pas autorisé(e) à participer à d'autres études cliniques pendant toute la durée du protocole, ni durant les 6 mois suivant la fin de ma participation,
  - que le Comité de Protection des Personnes Ile de France XI a émis un avis favorable en date du 27/01/2021,
  - que dans le cadre de cette étude le promoteur, le CHU de Clermont-Ferrand, a souscrit à une assurance couvrant cette recherche
  - que j'ai répondu en toute bonne foi aux questions concernant mon état de santé et ma participation à d'autres études
  - que je ne suis pas placé sous sauvegarde de justice,
- que je dois disposer d'un délai suffisant avant de signer ce consentement

## DIPPAO randomized controlled trial: study protocol

Les informations relatives à l'étude recueillies par l'investigateur sont traitées confidentiellement. J'accepte que les données enregistrées à l'occasion de cette recherche puissent faire l'objet d'un traitement informatisé. J'ai bien noté que les droits d'accès, de rectification du traitement des données prévus par la loi informatique et libertés du 6 janvier 1978 modifiée s'exercent à tout moment auprès du médecin qui me suit dans le cadre de la recherche et qui connaît mon identité ou du délégué de protection des données du promoteur dont les coordonnées sont mentionnées dans la lettre d'information qui m'a été remise.

**Après avoir discuté librement et obtenu réponse à toutes mes questions, j'accepte librement de participer à cette recherche impliquant la personne humaine dans les conditions précisées dans la lettre d'information et le formulaire de consentement.**

Nom et prénom du patient :

.....

Date :...../...../.....

Signature

Nom de l'investigateur :

.....

Date :...../...../.....

Signature :

*Ce document est à réaliser en 2 exemplaires originaux, dont le premier doit être gardé 15 ans par l'investigateur, un autre remis à la personne donnant son consentement.*
